# Supplementary material for: Designing MOF-based green nanomaterials for enhanced pathogen resistance and pesticide degradation in tomato plants
Source: Royal Society of Chemistry journal article supplement (doi:10.1039/d4en00966e), 2024-11-18
Supplement: d4en00966e1.pdf [file d4en00966e1.pdf]

## **Supplementary Information (SI)** DOI: <https://>

# **Designing of MOFs-Based Green Nanomaterials for Enhanced Pathogen Resistance and Pesticide Degradation in Tomato Plants**

Shoaib Khan<sup>1</sup>, Aoxue Wang<sup>1</sup>✉, Jiayin Liu<sup>1</sup>✉, Iltaf Khan<sup>2</sup>✉, Samreen Sadiq<sup>3</sup>, Aftab Khan<sup>4</sup>, Waleed Yaseen<sup>5</sup>, Saeed Zaman<sup>6</sup>, Abdul Mueed<sup>7</sup>, Yuanyang Miao<sup>1</sup>

<sup>1</sup>College of Horticulture and Landscape Architecture, Northeast Agricultural University, Harbin, 150030, China

<sup>2</sup>School of Environmental & Chemical Engineering, Jiangsu University of Science and Technology, Zhenjiang, 212100, China

<sup>3</sup>Jiangsu Key Laboratory of Sericultural and Animal Biotechnology, School of Biotechnology, Jiangsu University of Science and Technology, Zhenjiang, 212100, China

<sup>4</sup>Beijing Advanced Innovation Center for Soft Matter Science and Engineering, State Key Laboratory of Chemical Resource Engineering, School of Materials Science and Engineering, Beijing University of Chemical Technology, Beijing, 100029, China

<sup>5</sup>School of Chemistry and Chemical Engineering, Department of Pharmacy, Jiangsu University, Zhenjiang 212013, PR China

<sup>6</sup>College of Chemistry, Liaoning University, Shenyang, 110036, China

<sup>7</sup>State Key Laboratory of Food Science and Technology, Nanchang University, Nanchang, 330047, China

✉Corresponding Email (s): [axwang@neau.edu.cn](mailto:axwang@neau.edu.cn), [liujiayin@neau.edu.cn](mailto:liujiayin@neau.edu.cn), [doctoriltafkhan@just.edu.cn](mailto:doctoriltafkhan@just.edu.cn)

## **Table of Contents**

### **1. Experimental Part**

#### **1.1 Photoluminescence spectroscopy measurement**

#### **1.2 Free radicals trapping experiments**

#### **1.3 Fourier-transform infrared spectroscopy**

#### **1.4 BET surface area and pore diameter measurement**

### **2. Supporting Figures (Figure S1-S18)**

### **3. Supporting Tables (Table S1)**

### **1. Experimental Part**

#### **1.1 Photoluminescence spectroscopy measurement**

By using a Spectro fluorophotometer, the photoluminescence (PL) spectra of the synthesized samples were investigated. The excitation and emission wavelengths were adjusted to 248 nm and 600 nm, respectively. The excitation and emission

scanning parameters remained constant at a specific value that aligned with the absorption peak of the material.

## **1.2 Free radicals trapping experiments**

Extensive studies were carried out to validate the photocatalytic mechanism and degradation pathways of GLY and ACPH. Three scavenger species were employed to detect reactive species: EDTA-2Na, IPA, and benzoquinone to identify photogenerated holes, hydroxyl radicals, and superoxide radicals respectively. In the typical experiment, a small quantity of scavenger solutions was added to 50 mL solutions of GLY and ACPH having a concentration of 10 mg/L<sup>-1</sup>. This mixture was then exposed to irradiation for a duration of 1 h. Afterward, a 5 mL sample was taken, filtered, and investigated for pesticide concentration using a 400 W Xenon lamp at 497 nm.

## **1.3 Fourier-transform infrared spectroscopy**

The composition and molecular structure of samples were measured using the FT-IR spectrometer, with potassium bromide used as the diluent. The samples required exposure to specific frequencies of infrared radiation, which led to the stimulation of molecular vibrations or rotations. The analysis of the position of spectral absorption peaks enabled the classification of functional groups.

## **1.4 BET surface area and pore diameter measurement**

The surface area of the samples was measured using a Micromeritics Tristar II 3020 analyzer by analyzing nitrogen adsorption-desorption at a temperature of -196 °C. In the typical experiment, the sample weighing 0.1 g received pretreatment at a temperature of 150 °C to remove any moisture. Afterward, the samples that were previously pretreated (ZIF-67, SnO<sub>2</sub>, and SnO<sub>2</sub>/ZIF-67) were carefully placed in an apparatus designed to measure the BET surface area.

## 2. Supporting Figures

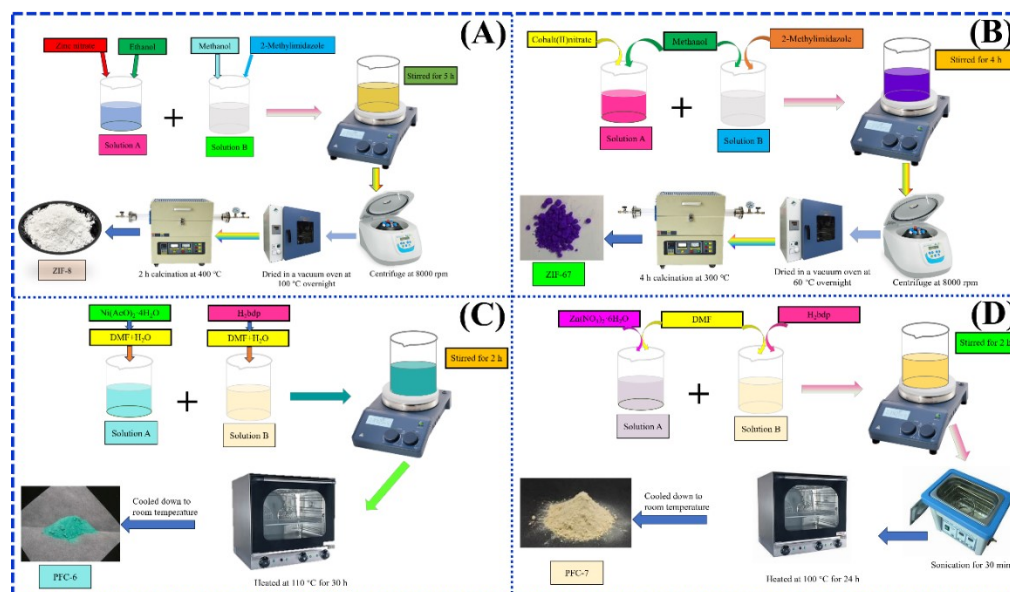

**Figure. S1.** Schematic representation for synthesis of MOFs (ZIF-8, ZIF-67, PFC-6, PFC-7).

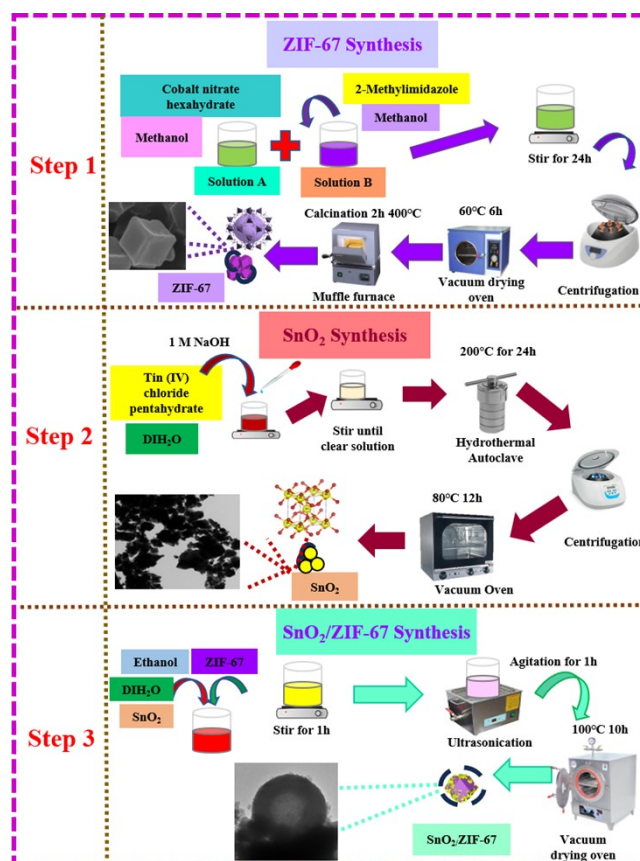

**Figure. S2.** Schematic representation for synthesis ZIF-67, SnO<sub>2</sub>, and SnO<sub>2</sub>/ZIF-67 nanocomposite.

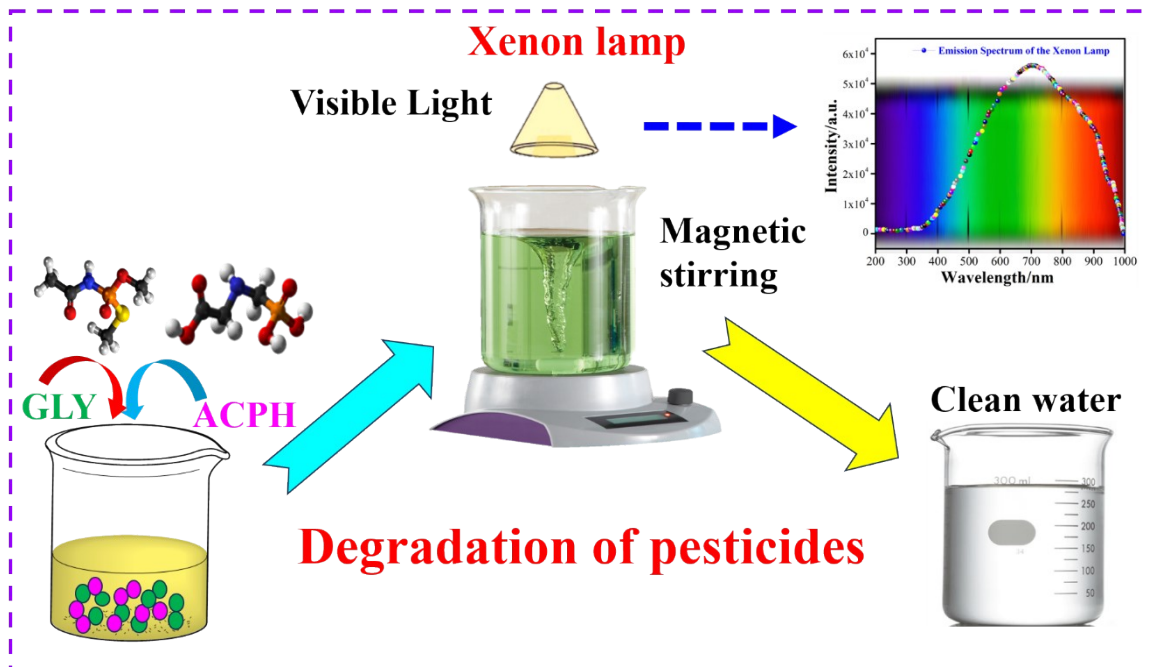

Figure. S3. Diagrammatical depiction of degradation of pesticides.

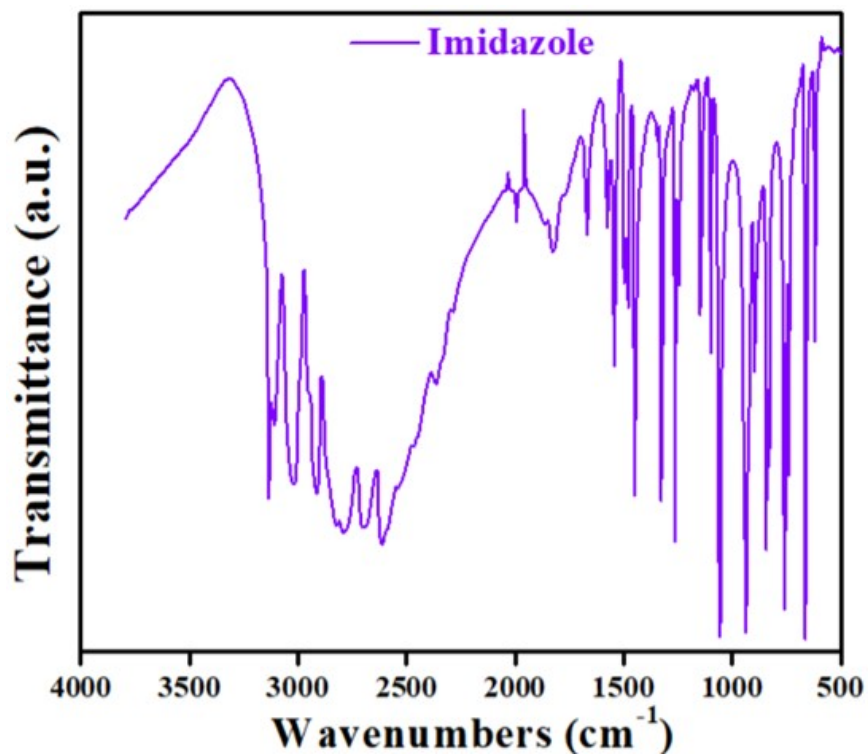

Figure. S4. IR spectrum of the imidazole.

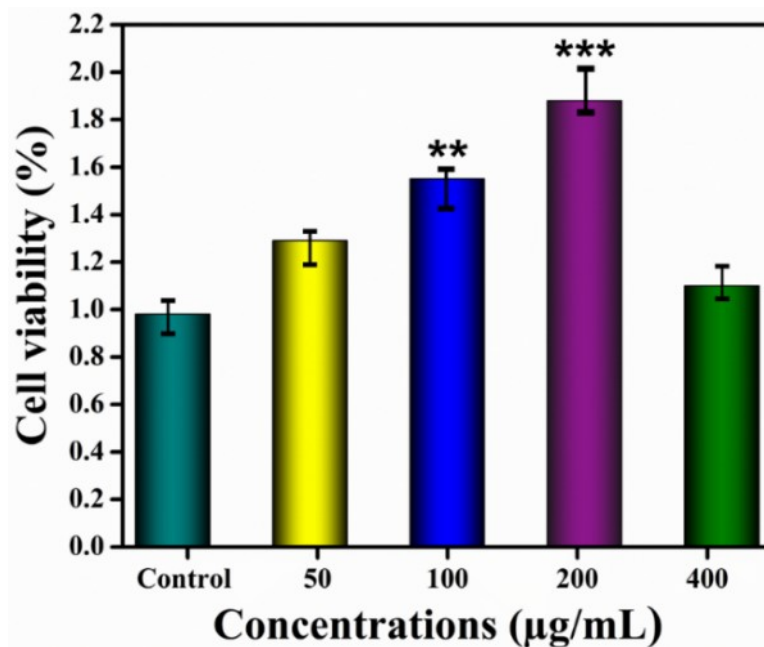

**Figure. S5.** The bar graph assessing the percentage of cell viability across four different concentrations using the CCK-8 assay. The concentration range of nanosheets (BPNSs) is between 50 and 400 µg/mL, with incubation periods of 4 h. The control consisted of the cell line that had no additives at all (0 µg/mL). The data are shown with standard deviation (n = 4; mean ± SD, ANOVA/Tukey's test; \*P < 0.05, \*\*P < 0.01, \*\*\*P < 0.001).

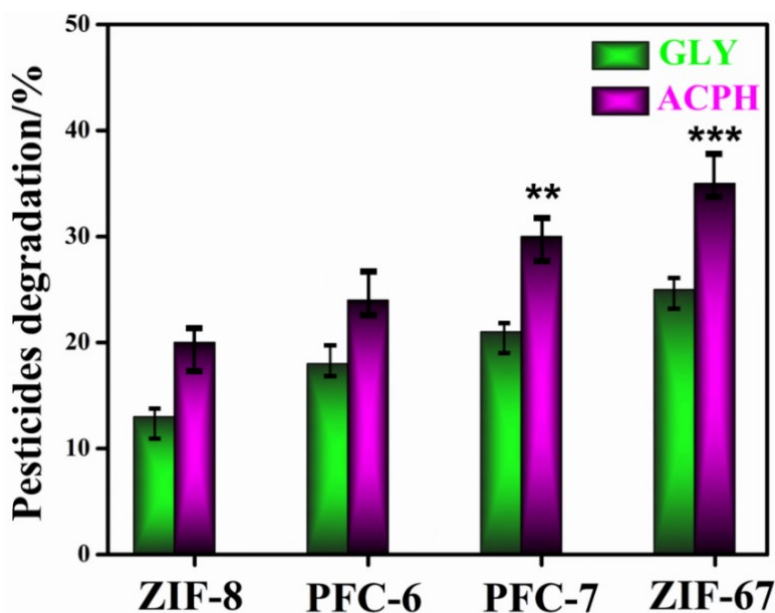

**Figure. S6.** Pesticide (GLY and ACPH) degradation over MOFs (ZIF-8, PFC-6, PFC-7, ZIF-67). The values are presented as the mean ± SD, with a sample size of n=4. Values are found to be statistically significant at a significance level of P < 0.05. Error bars represent the mean SEM; \*\* P < 0.01, \*\*\* P < 0.001.

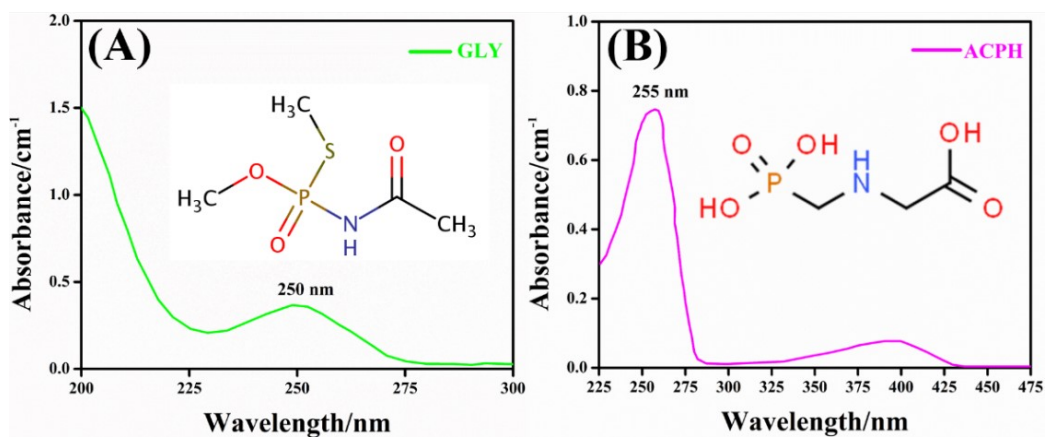

Figure. S7. UV absorbance model spectra of GLY (A) and ACPH (B).

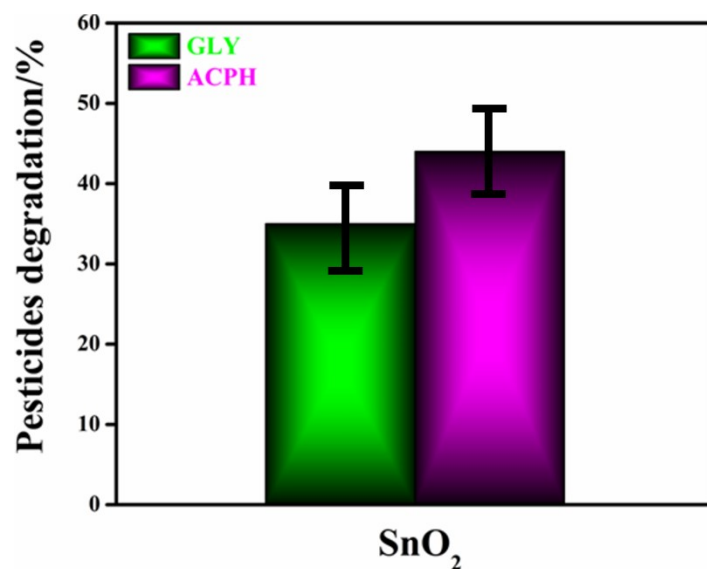

Figure. S8. GLY and ACPH degradation activities over SnO<sub>2</sub>.

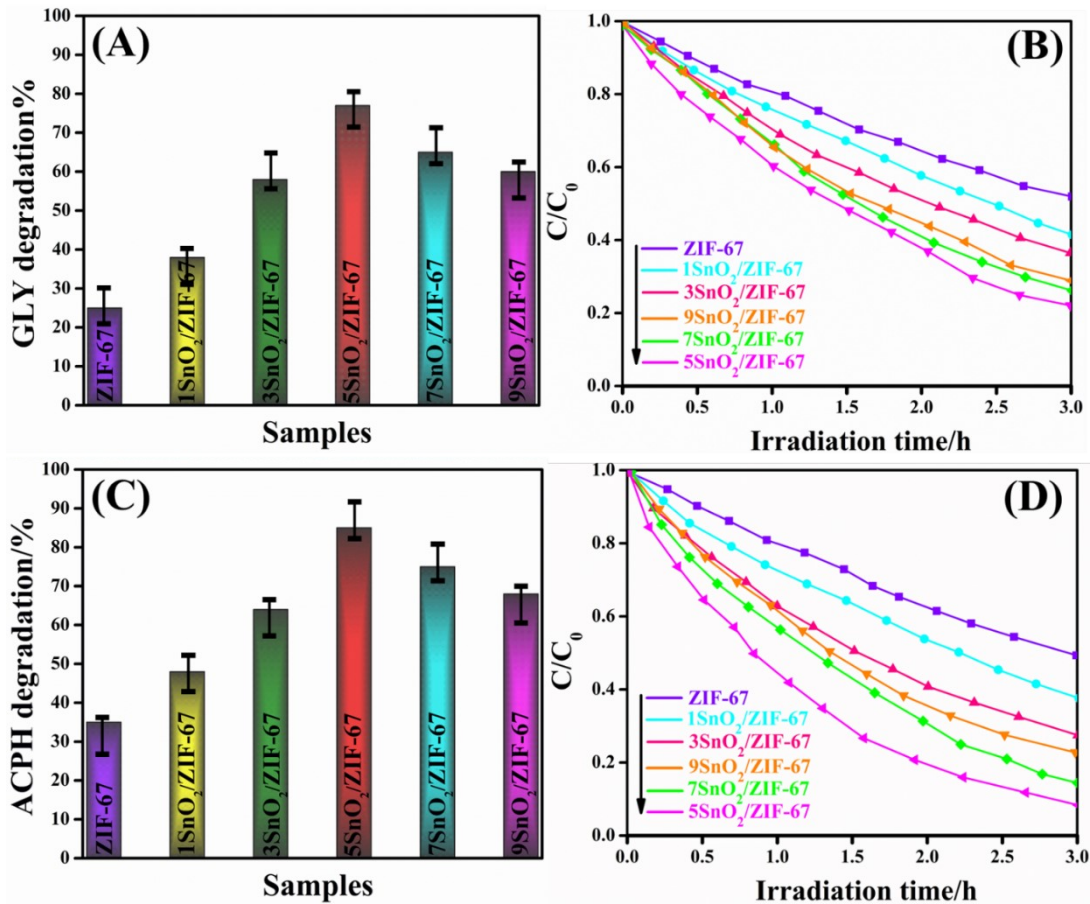

**Figure. S9.** GLY degradation activities (A), GLY time-dependent activities (B), ACPH degradation activities (C), and ACPH time-dependent activities (D) over ZIF-67 and  $\gamma$ SnO<sub>2</sub>/ZIF-67.

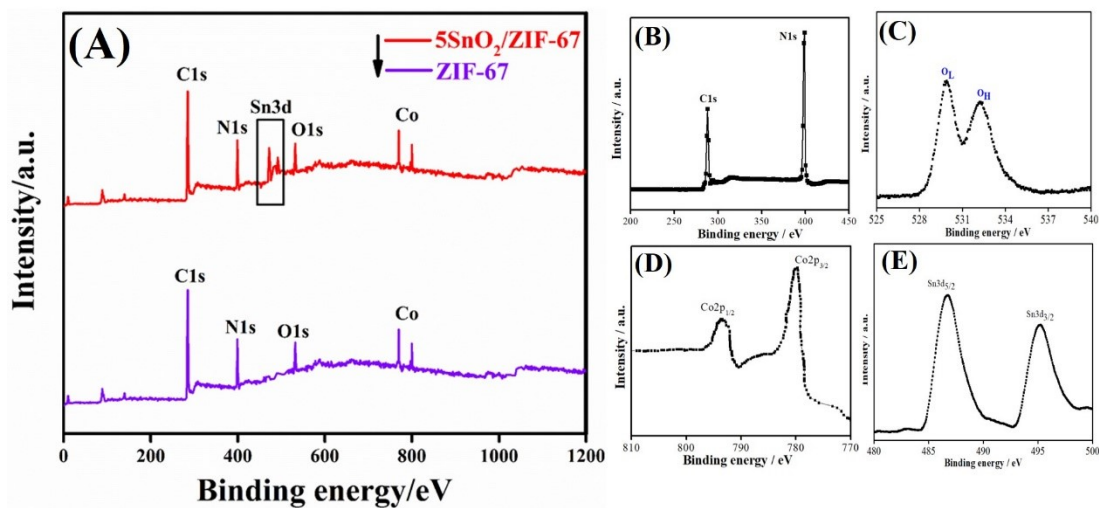

**Figure. S10.** XPS survey spectra of ZIF-67 and 5SnO<sub>2</sub>/ZIF-67 (A), High-resolution spectra of C-N(B), O (C), Co(D) and Sn(E).



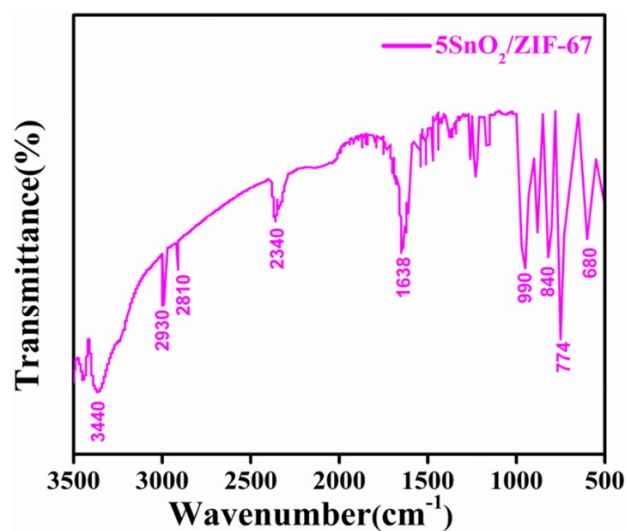

Figure. S11. FT-IR Spectra of 5ZIF-67/SnO<sub>2</sub>.

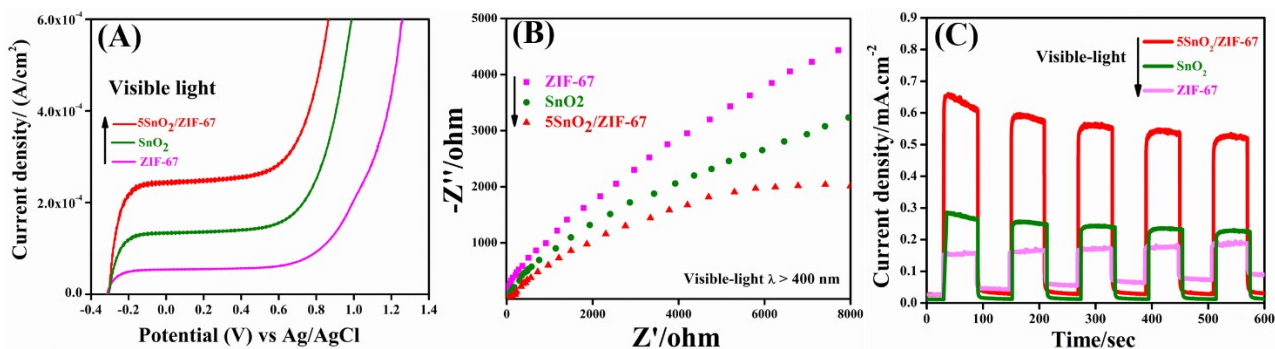

Figure. S12. PEC I-V curves (A), Electrochemical Impedance Spectra (EIS) (B), PEC I-t curves (C) of Pristine ZIF-67, SnO<sub>2</sub> and 5SnO/ZIF-67 nanocomposite.

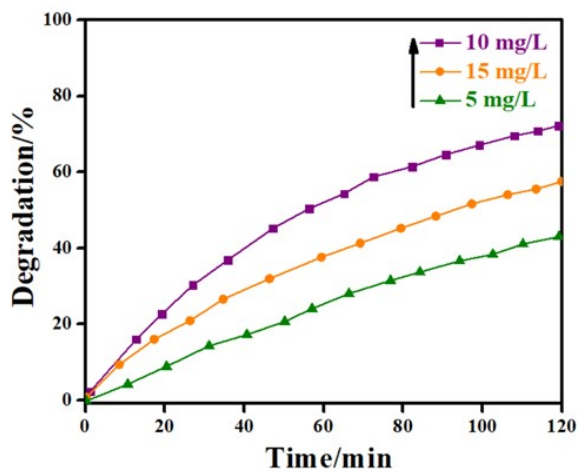

Figure. S13. GLY degradation activity tests with different concentrations over 5SnO/ZIF-67 nanocomposite.



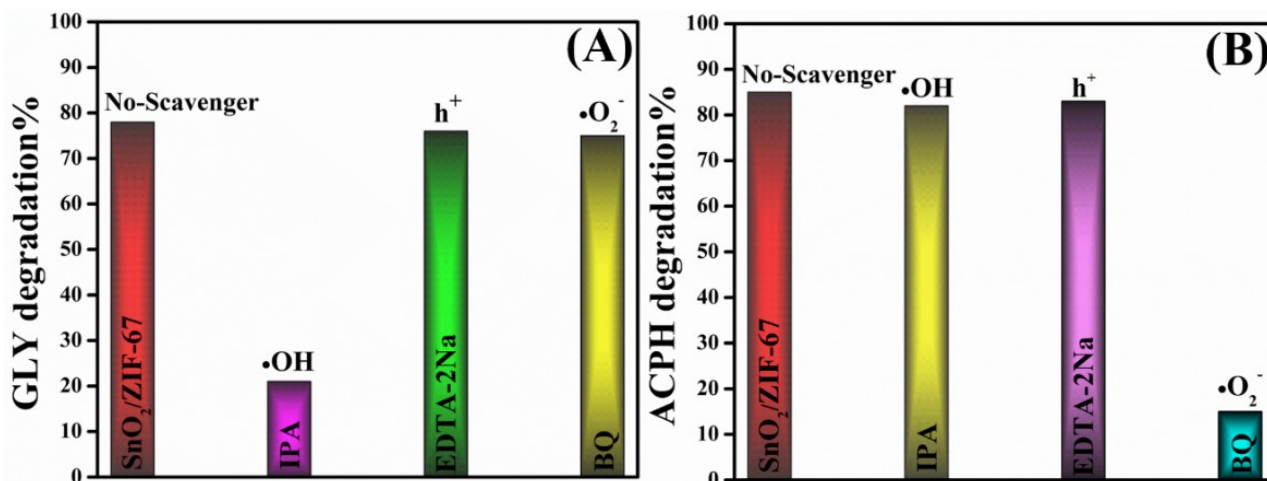

**Figure. S14.** Scavenger test for GLY (A), and ACPH (B) degradation over  $5\text{SnO}_2/\text{ZIF-67}$  nanocomposite.

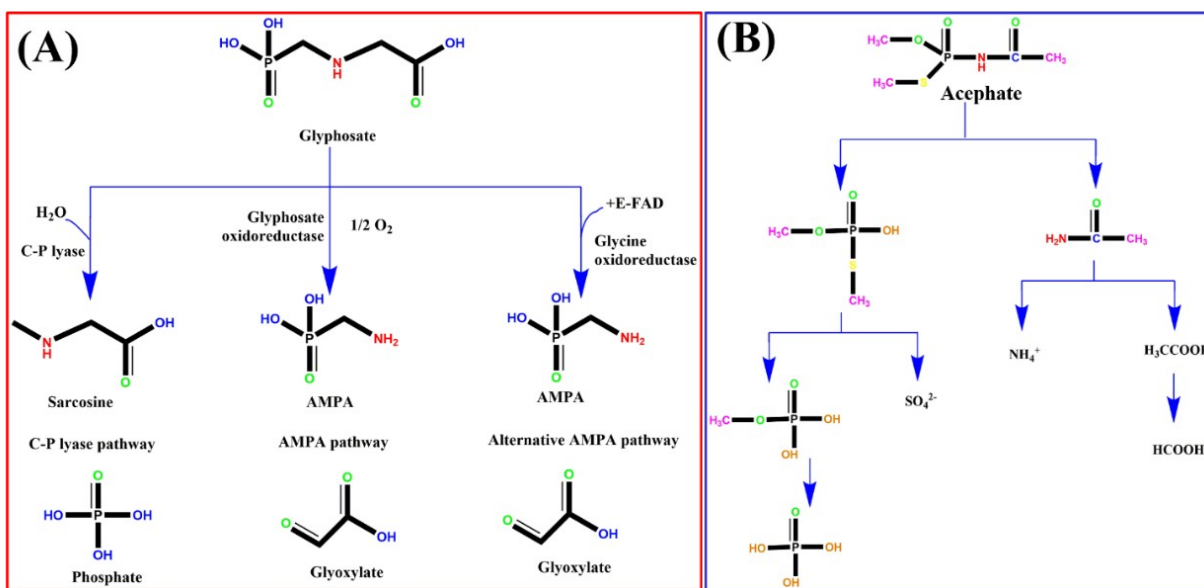

**Figure. S15.** Proposed Degradation pathways for GLY (A) and ACPH (B) degradation.

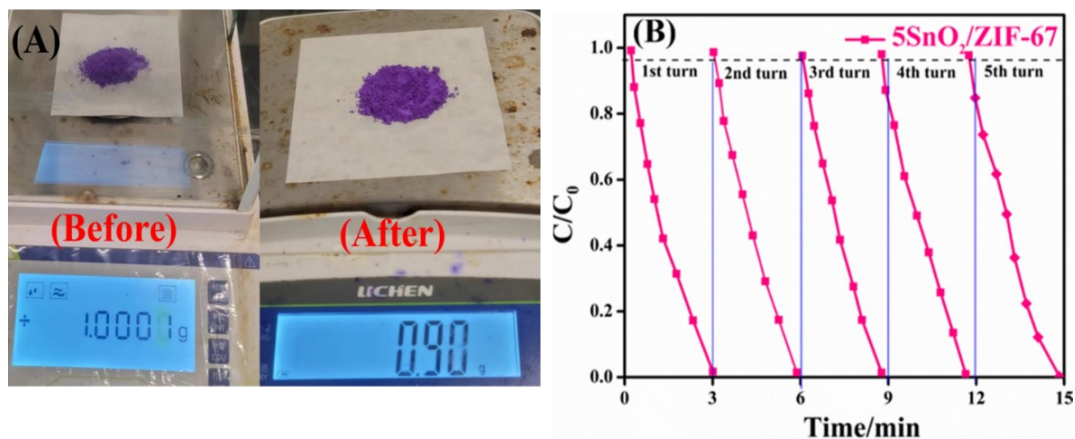

**Figure. S16.** Degradation activity stability (A), and recyclability test (B) of 5SnO<sub>2</sub>/ZIF-67 nanocomposite.

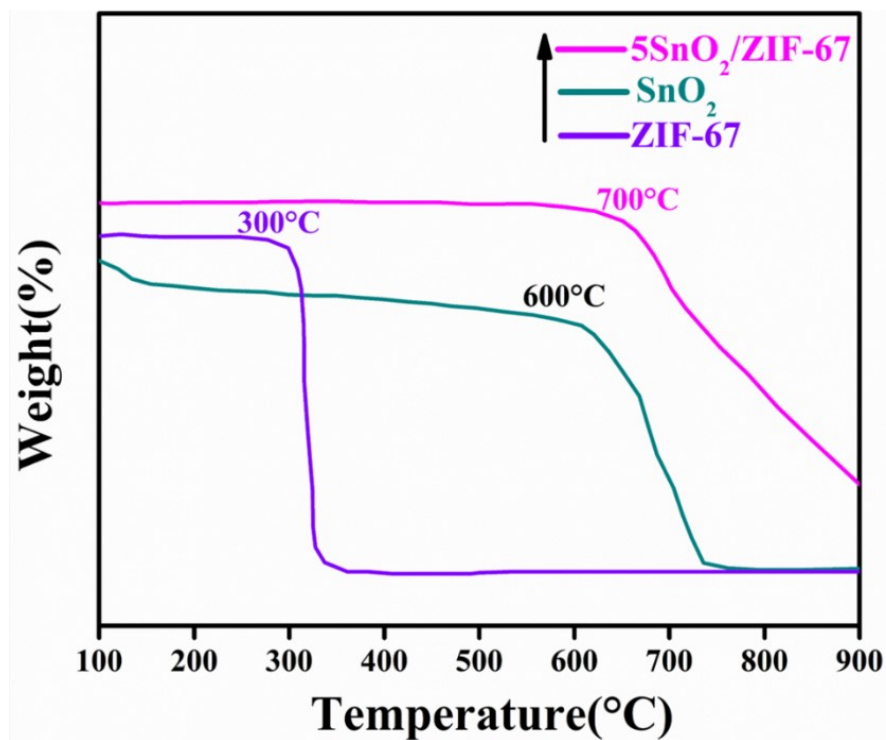

**Figure. S17.** TGA for ZIF-67, SnO<sub>2</sub>, and 5SnO<sub>2</sub>/ZIF-67 nanocomposite.

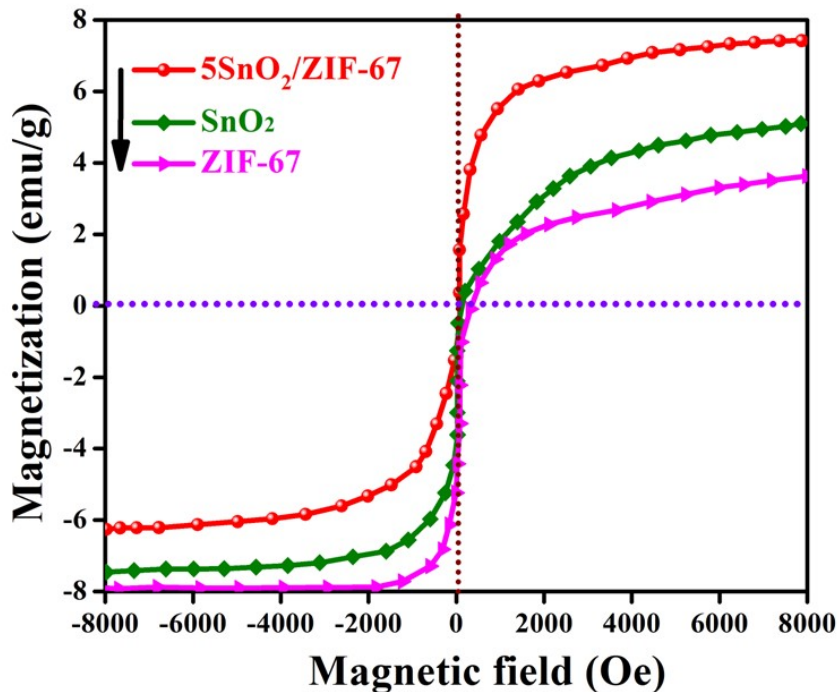

**Figure. S18.** Electron Paramagnetic Resonance Spectroscopy (EPR) of ZIF-67, SnO<sub>2</sub>, and 5SnO<sub>2</sub>/ZIF-67 nanocomposite.

### 3. Supporting Tables (S1)

**Table S1.** Chemicals and Reagents Purity, Chemical/Mass formula, CAS Number, and Supplier Company Information

| Component                            | Chemical Formula                                      | CAS Reg. No | Suppliers                               | Mass Purity |
|--------------------------------------|-------------------------------------------------------|-------------|-----------------------------------------|-------------|
| Deionized water                      | DIH <sub>2</sub> O                                    | 7732-18-5   | Aladdin Industrial Corporation Shanghai | 99.9        |
| Methanol                             | C <sub>3</sub> H <sub>7</sub> OH                      | 67-56-1     | Tian in Fuyu fine chemical Co., Ltd     | 99.9        |
| Zinc nitrate hexahydrate             | (Zn(NO <sub>3</sub> ) <sub>2</sub> ·6H <sub>2</sub> O | 10196-18-6  | Aladdin Industrial Corporation Shanghai | ≥99.5       |
| Cobalt (II) nitrate hexahydrate      | (Co(NO <sub>3</sub> ) <sub>2</sub> )                  | 10026-22-9  | Aladdin Industrial Corporation Shanghai | 99.0        |
| 2-methylimidazole                    | C <sub>4</sub> H <sub>6</sub> N <sub>2</sub>          | CID 12749   | Aladdin Industrial Corporation Shanghai | 99.0        |
| Nickel acetate tetrahydrate          | Ni(AcO) <sub>2</sub> ·4H <sub>2</sub> O               | 6018-89-9   | Aladdin Industrial Corporation Shanghai | 99.0        |
| Dihydroxybiphenyl-2,2'-dicarboxylate | C <sub>14</sub> H <sub>8</sub> O <sub>6</sub>         | 97 92-88-6  | Aladdin Industrial Corporation Shanghai | 99.0        |
| N, N-dimethylformamide               | (CH <sub>3</sub> ) <sub>2</sub> NC(O)H                | 68-12-2     | Aladdin Industrial Corporation Shanghai | 99.9        |

|                                |                                                   |            |                                                                      |      |
|--------------------------------|---------------------------------------------------|------------|----------------------------------------------------------------------|------|
| Zirconium tetrachloride        | ZrCl <sub>4</sub>                                 | 10026-11-6 | Aladdin Industrial Corporation Shanghai                              | 99.9 |
| Hydroxy terephthalic acid      | C <sub>8</sub> H <sub>6</sub> O <sub>5</sub>      | 636-94-2   | Aladdin Industrial Corporation Shanghai                              | 99.9 |
| Tin (IV) chloride pentahydrate | SnCl <sub>4</sub>                                 | 10026-06-9 | Aladdin Industrial Corporation Shanghai                              | 99.9 |
| Ethanol                        | C <sub>2</sub> H <sub>5</sub> OH                  | 64-17-5    | Aladdin Industrial Corporation Shanghai                              | 95.6 |
| <i>E. coli</i>                 | DH5α                                              | AB 204033  | Biotechnology Department of Northeast Agricultural University, China | 99.0 |
| <i>A. niger</i>                | CBS 513.88                                        | ATCC90029  | Biotechnology Department of Northeast Agricultural University, China | 99.0 |
| <i>S. aureus</i>               | MRSA252                                           | ATCC25923  | Biotechnology Department of Northeast Agricultural University, China | 99.0 |
| Glyphosate                     | C <sub>3</sub> H <sub>8</sub> NO <sub>5</sub> P   | 1071-83-6  | Aladdin Industrial Corporation Shanghai                              | 99.8 |
| Acephate                       | C <sub>4</sub> H <sub>10</sub> NO <sub>3</sub> PS | 30560-19-1 | Aladdin Industrial Corporation Shanghai                              | 99.8 |
